# Supplementary material
Source: MDPI journal article supplement (https://www.mdpi.com/2073-4344/13/7/1132)
Supplement: s1 [file s1 › catalysts-2482518-supplementary.pdf]

## **Supplementary Materials**

# **Templating Synthesis of Hierarchically Porous Carbon with Magnesium Salts for Electrocatalytic Reduction of 4-Nitrophenol**

Wanyi Gan, Ping Xiao \* and Junjiang Zhu \*

Hubei Key Laboratory of Biomass Fibers and Eco-Dyeing & Finishing,  
College of Chemistry and Chemical Engineering, Wuhan Textile University  
Chemistry, Wuhan 430200, China

\* Correspondence: [jjzhu@wtu.edu.cn](mailto:jjzhu@wtu.edu.cn); [pxiao@wtu.edu.cn](mailto:pxiao@wtu.edu.cn)

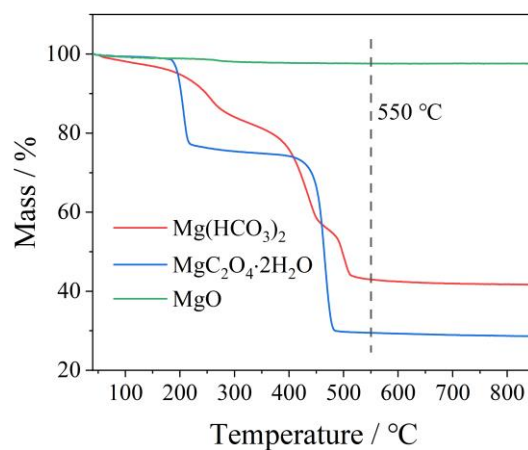

**Figure S1.** TGA profiles of magnesium precursors conducted in N<sub>2</sub> atmosphere.

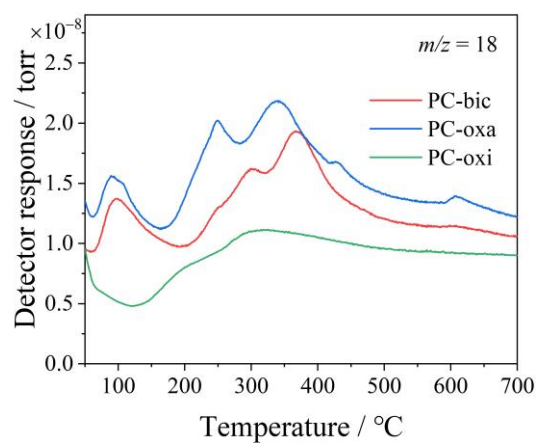

**Figure S2.** MS signal of H<sub>2</sub>O obtained from the TPD of PC-n (n = bic, oxa and oxi).

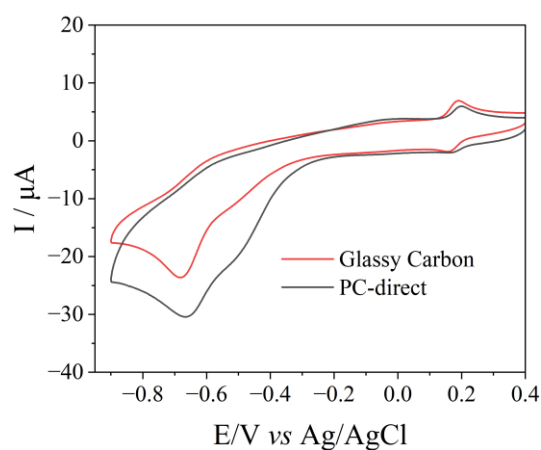

**Figure S3.** CV curves of the PC-direct and Glassy Carbon for electrocatalytic reduction of 4-nitrophenol (0.1 mM) in 0.2 M phosphate buffer solution at pH 6.0, with a scan rate of 20 mV s<sup>-1</sup>.

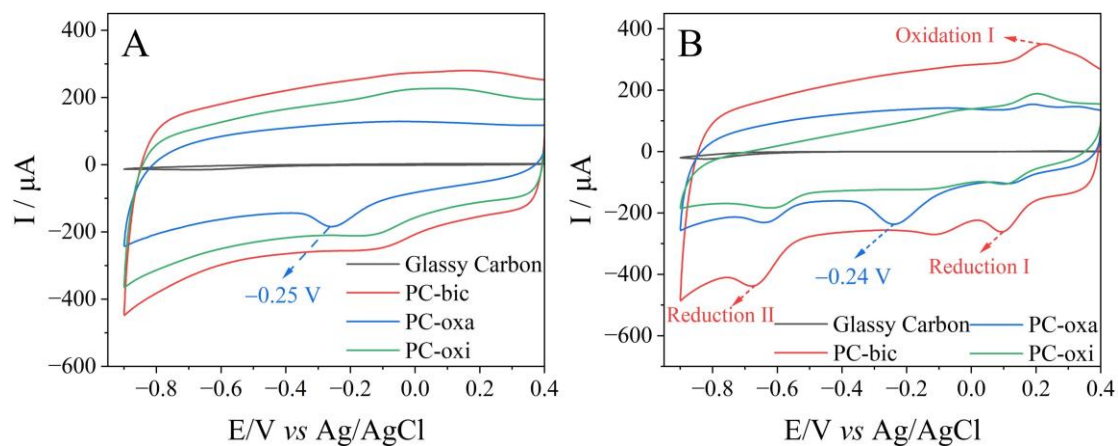

**Figure S4.** CV curves of PCs and Glassy Carbon electrode in (A) 0.2 M phosphate buffer solution at pH 6.0 and (B) 0.2 M phosphate buffer solution at pH 6.0 containing 4-nitrophenol (0.1 mM), with a scan rate of  $20 \text{ mV s}^{-1}$ .

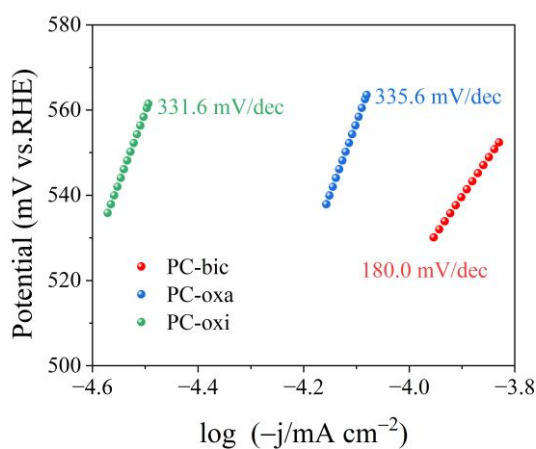

**Figure S5.** The Tafel slopes of PC-bic, PC-oxi and PC-oxa samples.

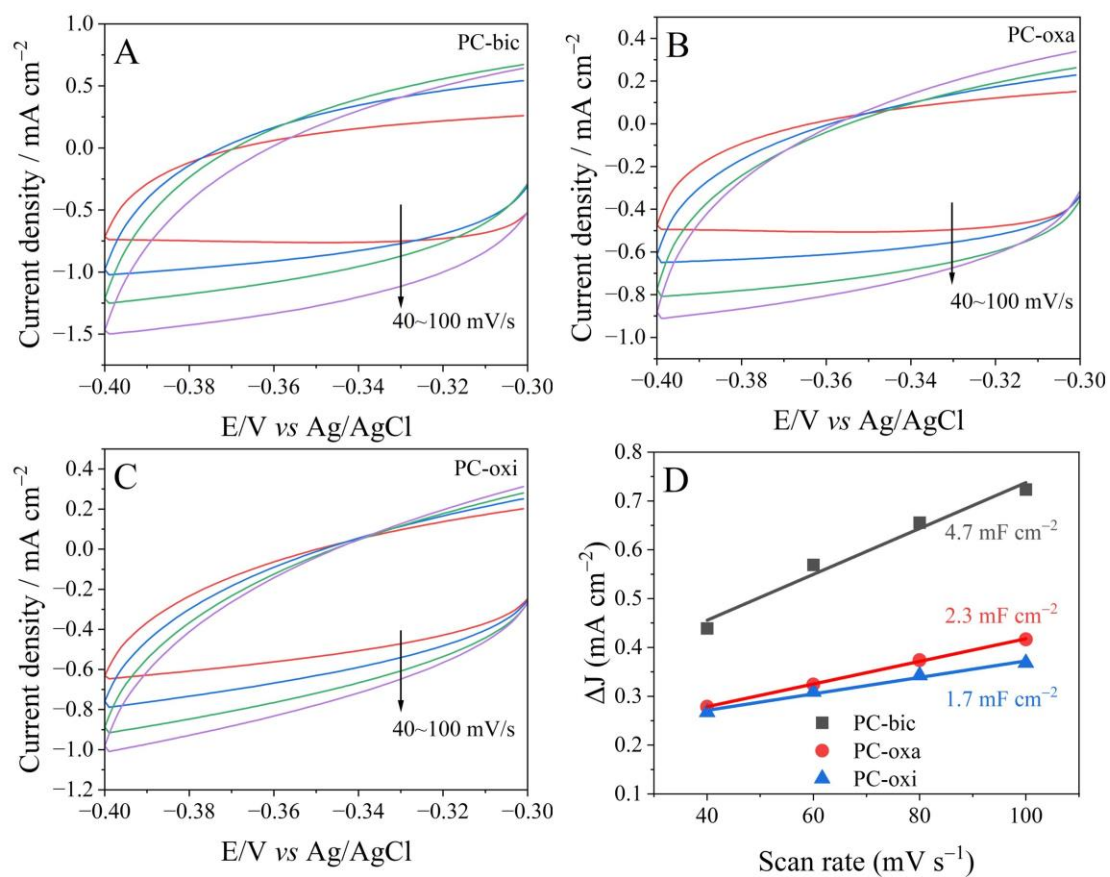

**Figure S6.** CV curves of (A) PC-bic, (B) PC-oxa, (C) PC-oxi with different scan rate; (D)  $C_{dl}$  curves of PC-bic, PC-oxa and PC-oxi.

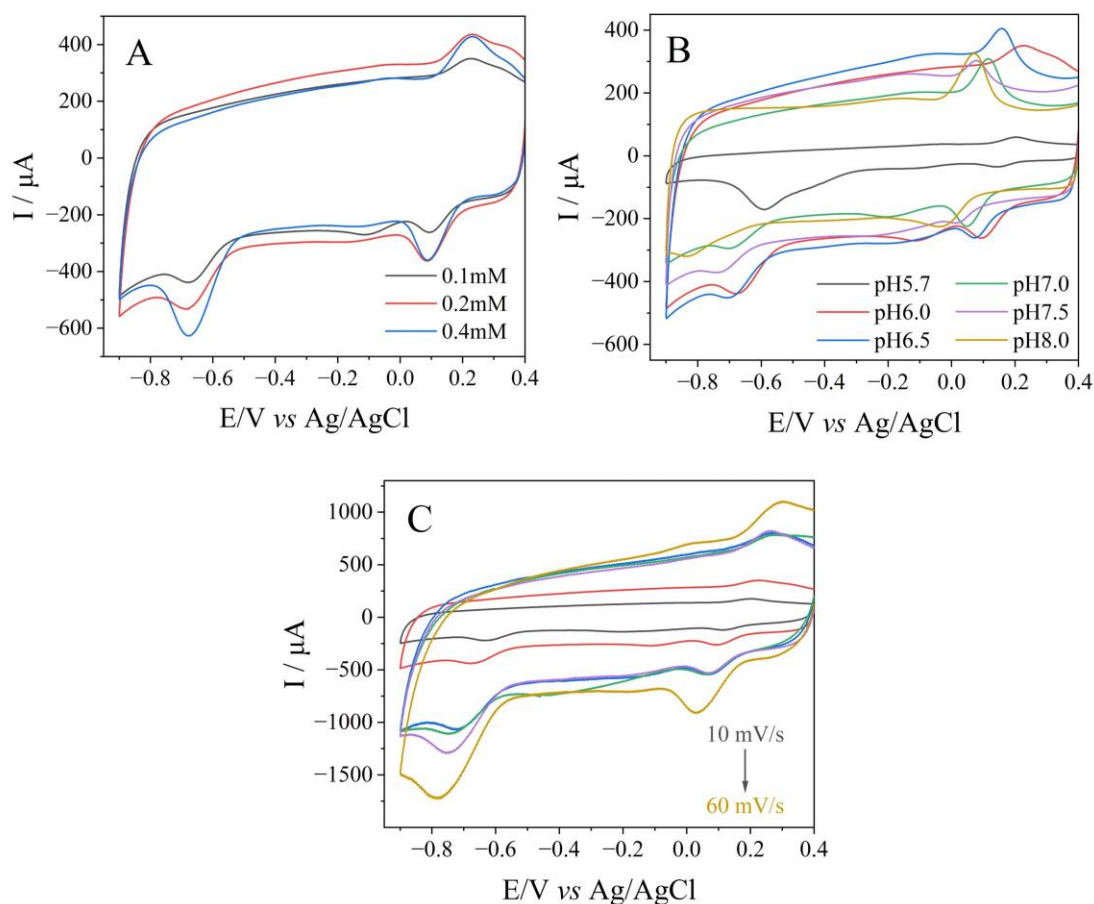

**Figure S7.** (A) CV curves of PC-bic in 0.2 M phosphate buffer solution (pH = 6.0) at various concentrations of 4-nitrophenol; (B) Effect of pH on the CV curves of PC-bic in 0.2 M phosphate buffer solution (pH = 6.0) with 0.1 mM 4-nitrophenol solution; (C) CV curves of PC-bic for electrocatalytic reduction of 4-nitrophenol (0.1 mM) obtained at scan rates of 10–60  $mV s^{-1}$  in a 0.2 M phosphate buffer solution (pH = 6.0).

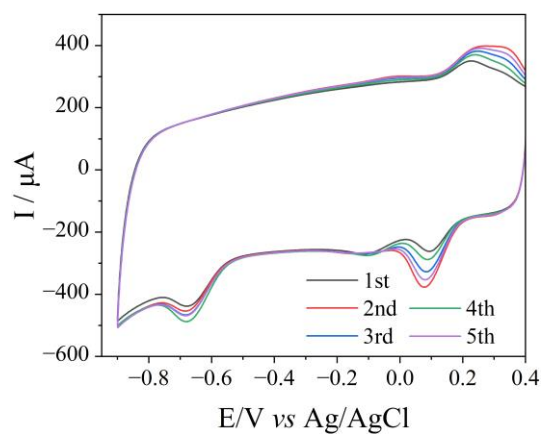

**Figure S8.** CV curves of PC-bic for electrocatalytic reduction of 4-nitrophenol (0.1 mM) within five cycles in 0.2 M phosphate buffer solution (pH = 6.0).

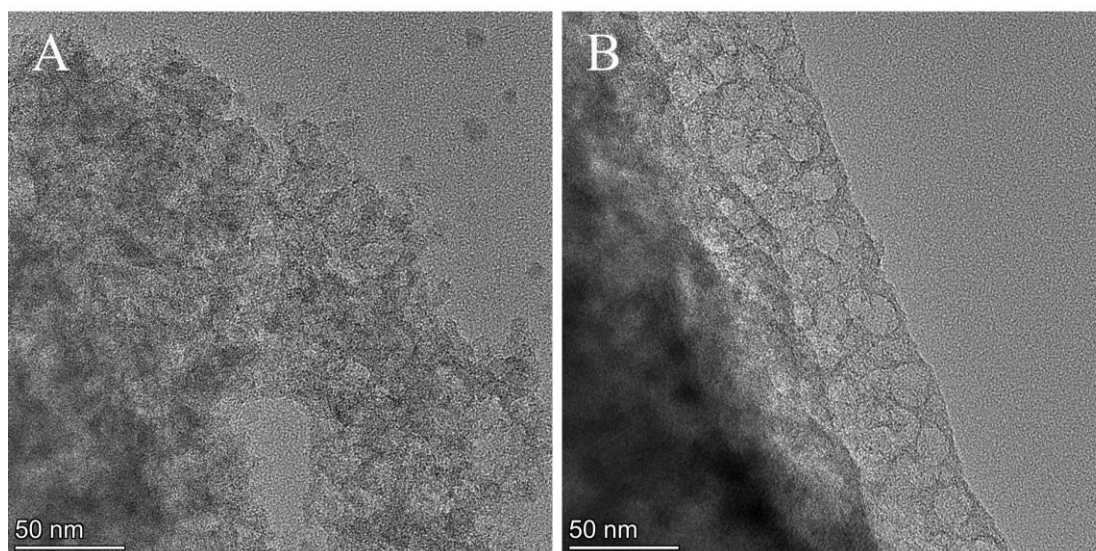

**Figure S9.** TEM images of (A) Fresh PC-bic and (B) recycled PC-bic after the electrocatalytic reduction of 4-NP.

**Table S1.** The reaction conditions and activities of varied catalysts for electrocatalytic reduction of 4-NP.

| Entry | Catalyst                                                          | Electrolyte              | pH  | 4-NP conc.<br>/ $\mu\text{M}$ | Scan rate<br>/ $\text{mV s}^{-1}$ | Potential<br>/ V | Current<br>/ $\mu\text{A}$ | Current<br>density<br>/ $\mu\text{A cm}^{-2}$ | Ref       |
|-------|-------------------------------------------------------------------|--------------------------|-----|-------------------------------|-----------------------------------|------------------|----------------------------|-----------------------------------------------|-----------|
| 1     | g-C <sub>3</sub> N <sub>4</sub>                                   | 0.1 M PB                 | 5.0 | 150                           | 50                                | --               | --                         | --                                            | [1]       |
| 2     | ZnFe <sub>2</sub> O <sub>4</sub> /g-C <sub>3</sub> N <sub>4</sub> | 0.1 M PB                 | 5.0 | 150                           | 50                                | -0.58 V          | -8.1                       | --                                            | [1]       |
| 3     | rGO                                                               | 0.1 M PBS <sup>[a]</sup> | 7.0 | 10                            | 50                                | -0.73            | -1.3                       | -58.8                                         | [2]       |
| 4     | NiFe <sub>2</sub> O <sub>4</sub>                                  | 0.1 M PBS <sup>[a]</sup> | 7.0 | 10                            | 50                                | -0.72            | -7.2                       | -335.3                                        | [2]       |
| 5     | NiFe <sub>2</sub> O <sub>4</sub> /rGO <sub>10</sub>               | 0.1 M PBS <sup>[a]</sup> | 7.0 | 10                            | 50                                | -0.81            | -10.9                      | -509.8                                        | [2]       |
| 6     | RGO                                                               | 0.2 M PB                 | 5.5 | 100 <sup>[b]</sup>            | 50                                | -0.571           | -51.0                      | -721.9                                        | [3]       |
| 7     | GO                                                                | 0.2 M PB                 | 5.5 | 100 <sup>[b]</sup>            | 50                                | -0.615           | -6.4                       | -90.6                                         | [3]       |
| 8     | Fe <sub>3</sub> O <sub>4</sub> /Ag <sub>2.0</sub>                 | 0.1 M BR <sup>[c]</sup>  | 4.0 | 100                           | 100                               | -0.574           | -13.3                      | --                                            | [4]       |
| 9     | Cu                                                                | 0.1 M PB                 | 6.0 | 1000                          | 50                                | -0.76            | -48.4                      | -691.4                                        | [5]       |
| 10    | Cu-curcumin                                                       | 0.1 M PB                 | 6.0 | 1000                          | 50                                | -0.62            | -76.3                      | -1090.0                                       | [5]       |
| 11    | PC-c                                                              | 0.2 M PB                 | 6.0 | 100                           | 50                                | -0.520           | -167.3                     | -1943.4                                       | [6]       |
| 12    | PC-bic                                                            | 0.2 M PB                 | 6.0 | 100                           | 50                                | -0.759           | -566.4                     | -2886.1                                       | This work |

<sup>[a]</sup> phosphate buffer saline (Na<sub>2</sub>HPO<sub>4</sub>, NaH<sub>2</sub>PO<sub>4</sub>·H<sub>2</sub>O and KCl); <sup>[b]</sup> m-NP concentration; <sup>[c]</sup> Britton–Robinson (BR) buffer solutions (H<sub>3</sub>BO<sub>3</sub>, H<sub>3</sub>PO<sub>4</sub>, and CH<sub>3</sub>COOH).

## References:

1. Chinnapaiyan, S.; Chen, T.W.; Chen, S.M.; Abdullah Alothman, Z.; Ajmal Ali, M.; Wabaidur, S.M.; Al-Hemaid, F.; Lee, S.Y.; Chang, W.H. Ultrasonic-assisted preparation and characterization of magnetic ZnFe<sub>2</sub>O<sub>4</sub>/g-C<sub>3</sub>N<sub>4</sub> nanomaterial and their applications towards electrocatalytic reduction of 4-nitrophenol. *Ultrason. Sonochem.* **2020**, *68*, 105071.
2. Renu; Komal; Kaur, R.; Kaur, J.; Jyoti; Kumar, V.; Tikoo, K.B.; Rana, S.; Kaushik, A.; Singhal, S. Unfolding the electrocatalytic efficacy of highly conducting NiFe<sub>2</sub>O<sub>4</sub>-rGO nanocomposites on the road to rapid and sensitive detection of hazardous p-Nitrophenol. *J. Electroanal. Chem.* **2021**, *887*, 11516s1.
3. Shi, Q.; Chen, M.; Diao, G. Electrocatalytical reduction of m-nitrophenol on reduced graphene oxide modified glassy carbon electrode. *Electrochim. Acta* **2013**, *114*, 693-699.
4. Ho, V.M.H.; Vo, T.K.; Nguyen, T.H.A.; Dinh, Q.K.; Nguyen, V.C. Dual role of flower-like Fe<sub>3</sub>O<sub>4</sub>/Ag microstructure in electrocatalytic detection and catalytic reduction of 4-nitrophenol. *Mater. Sci. Semicond. Process.* **2023**, *160*, 107441.
5. Dinesh, B.; Saraswathi, R. Electrochemical synthesis of nanostructured copper-curcumin complex and its electrocatalytic application towards reduction of 4-nitrophenol. *Sens. Actuators, B* **2017**, *253*, 502-512.
6. Xiao, P.; Wang, S.; Xu, X.; Zhu, J. In-situ template formation method to synthesize hierarchically porous carbon for electrocatalytic reduction of 4-nitrophenol. *Carbon* **2021**, *184*, 596-608.
